# Supplementary material for: Ultra-high energy-storage density and fast discharge speed of (Pb0.98−xLa0.02Srx)(Zr0.9Sn0.1)0.995O3 antiferroelectric ceramics prepared via the tape-casting method
Source: Royal Society of Chemistry journal article supplement (doi:10.1039/c9ta02149c), 2019-01-01
Supplement: c9ta02149c1.pdf [file c9ta02149c1.pdf]

## Supplementary Information

### **Ultra-high energy-storage density and fast discharge speed of $(\text{Pb}_{0.98-x}\text{La}_{0.02}\text{Sr}_x)(\text{Zr}_{0.9}\text{Sn}_{0.1})_{0.995}\text{O}_3$ antiferroelectric ceramics prepared via tape-casting method**

Xiaohui Liu,<sup>ab</sup> Yong Li<sup>a</sup> and Xihong Hao<sup>ab\*</sup>

<sup>a</sup> *Inner Mongolia Key Laboratory of Ferroelectric-related New Energy Materials and Devices, Inner Mongolia University of Science and Technology, Baotou 014010, China.*

<sup>b</sup> *Key Laboratory of Integrated Exploitation of Bayan Obo Multi-Metal Resources, Inner Mongolia University of Science and Technology, Baotou 014010, China*

E-mail: [xhhao@imust.cn](mailto:xhhao@imust.cn) (X. Hao)

\* Corresponding Author.

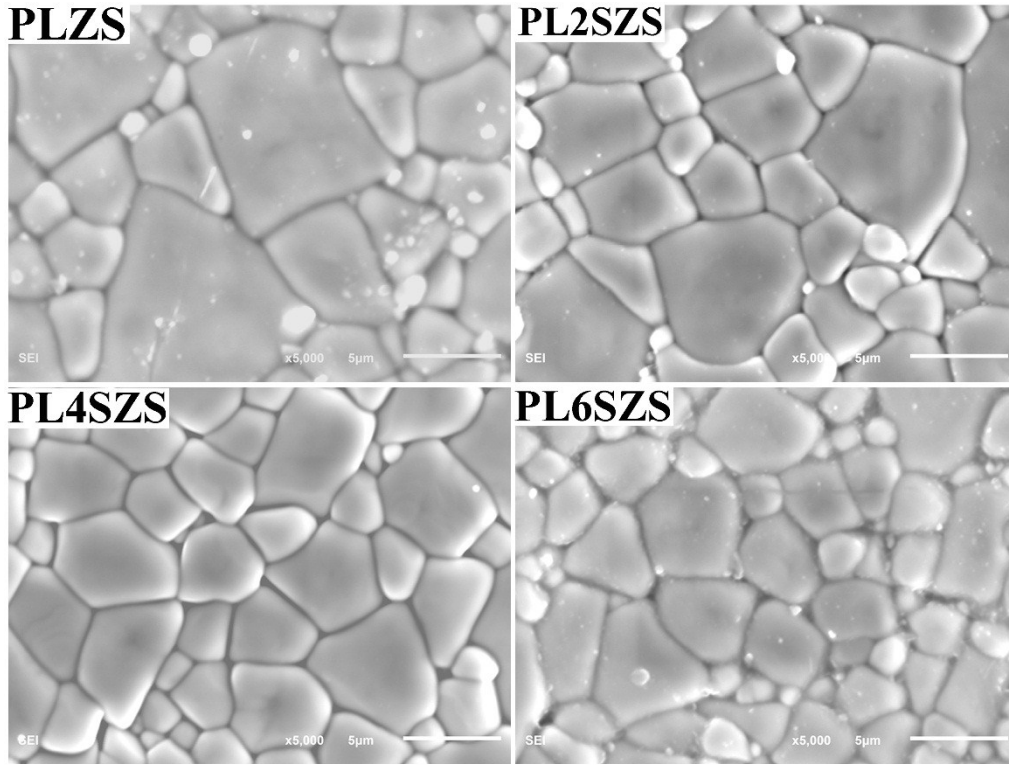

**Fig. S1** The SEM images of PLSZS AFE ceramics with different  $\text{Sr}^{2+}$  contents.

Evidently, all ceramics exhibit dense microstructure. With the increase of  $\text{Sr}^{2+}$  concentration, the grain sizes gradually decrease and have a more uniform distribution, which in turn is beneficial to improve breakdown strength (BDS).

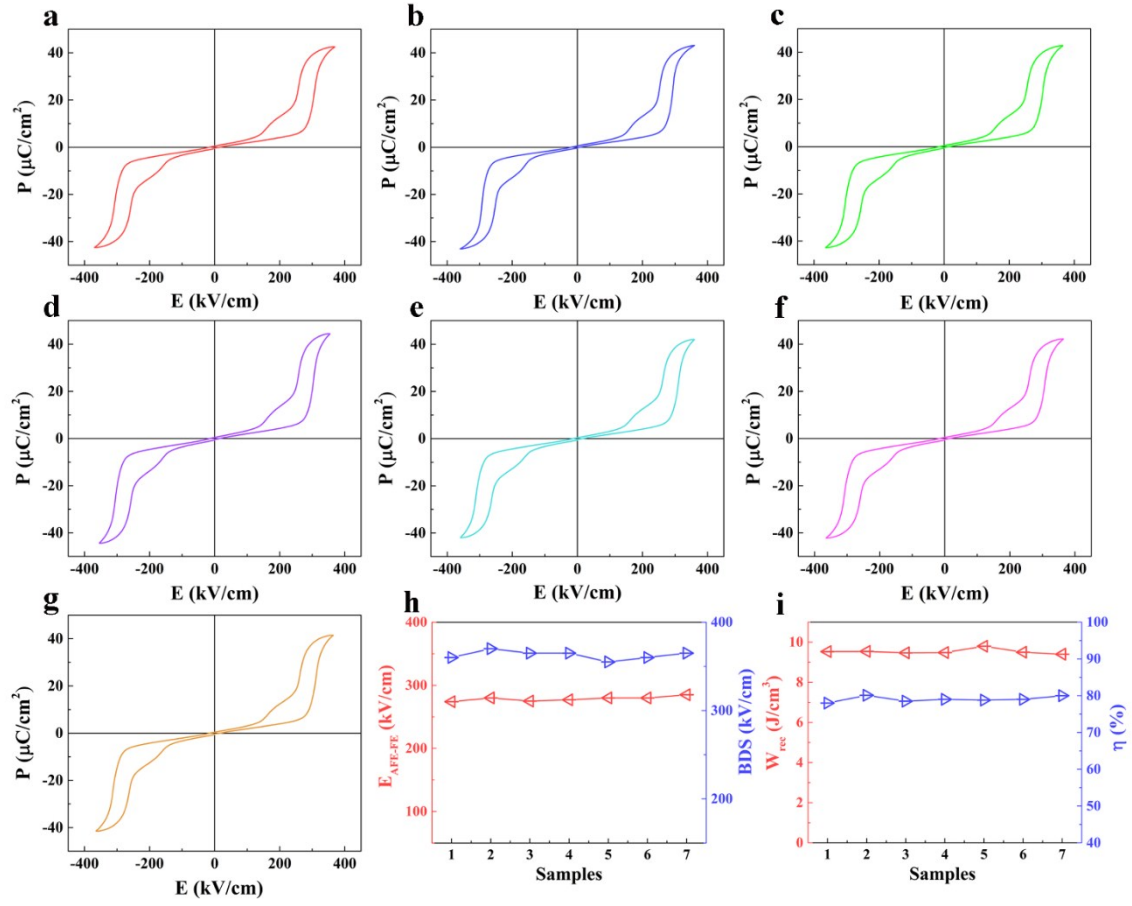

**Fig. S2** (a–g) The P–E loop of the PL2SZS ceramics with different samples under the breakdown electric field. (h) The  $E_{\text{AFE-FE}}$  and BDS of the PL2SZS ceramics with different samples. (i) The  $W_{\text{rec}}$  and  $\eta$  of the PL2SZS ceramics with different samples.

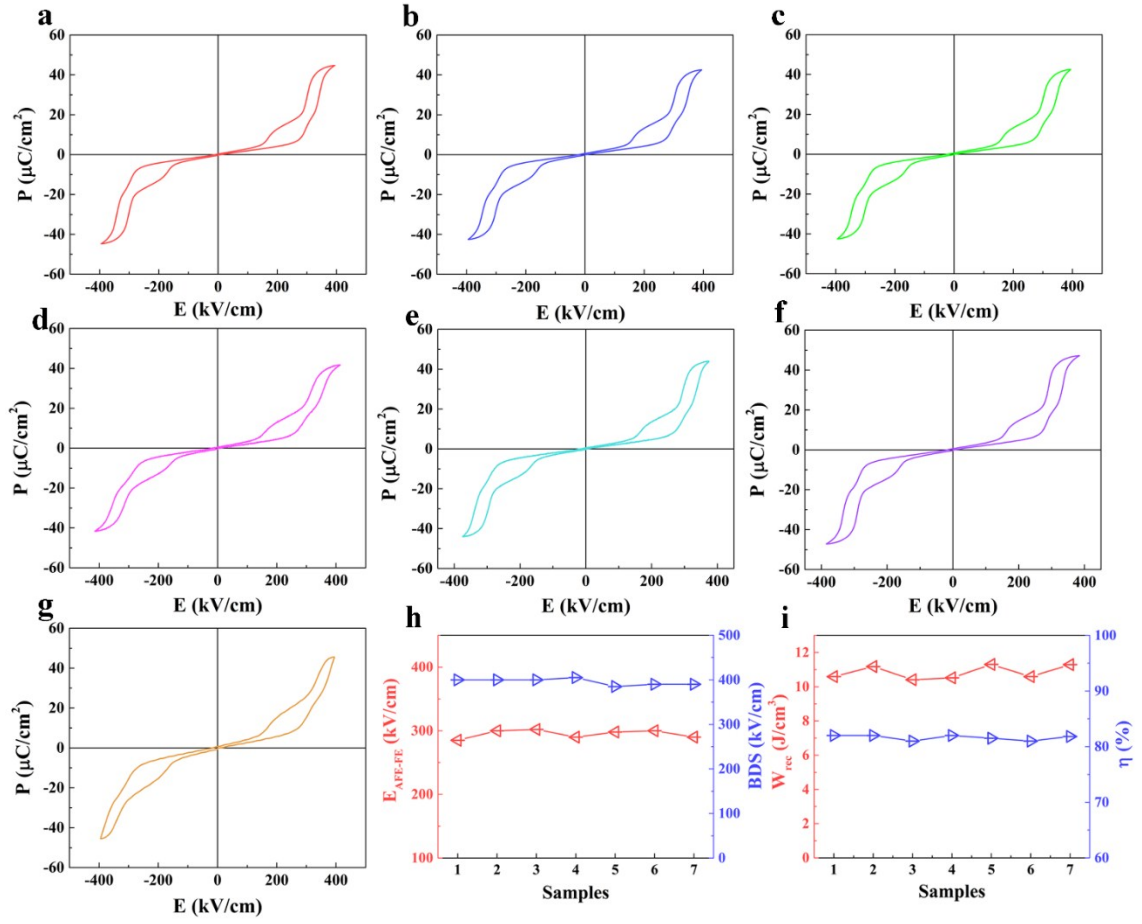

**Fig. S3** (a–g) The P–E loop of the PL4SZS ceramics with different samples under the breakdown electric field. (h) The  $E_{AFE-FE}$  and BDS of the PL4SZS ceramics with different samples. (i) The  $W_{rec}$  and  $\eta$  of the PL4SZS ceramics with different samples.

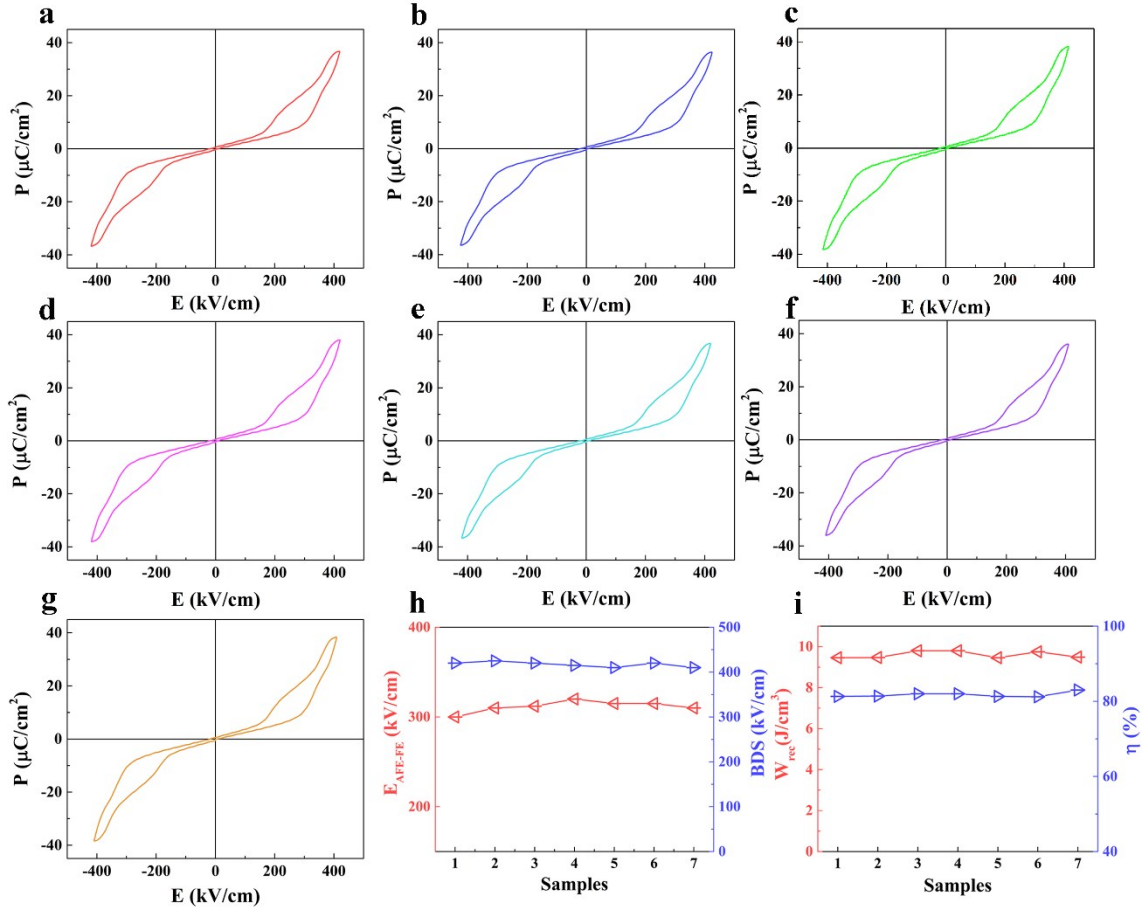

**Fig. S4** (a–g) The P–E loop of the PL6SZS ceramics with different samples under the breakdown electric field. (h) The  $E_{\text{AFE-FE}}$  and BDS of the PL6SZS ceramics with different samples. (i) The  $W_{\text{rec}}$  and  $\eta$  of the PL6SZS ceramics with different samples.

Supplementary Note S2–S4:

we prepared ten samples for PL2SZS, PL4SZS and PL6SZS ceramics respectively, and randomly selected seven samples of each component for P–E loops tests. Through P–E loops tests, we calculated the phase switching field ( $E_{\text{AFE-FE}}$ ), breakdown strength (BDS), energy-storage density ( $W_{\text{rec}}$ ) and energy efficiency ( $\eta$ ). As a result, the rate of variation of these parameters for the same component is very small, indicating that high energy-storage performance is not an accidental factor.
